# Supplementary material
Source: HighWire-hosted journal article supplement (https://erj.ersjournals.com/content/53/5/1802243)

**Nationwide cloud-based integrated database of idiopathic interstitial pneumonias for  
multidisciplinary discussion**

**Authors:** Tomoyuki Fujisawa<sup>1</sup>, Kazutaka Mori<sup>1</sup>, Masashi Mikamo<sup>1</sup>, Takashi Ohno<sup>2</sup>, Kensuke Kataoka<sup>3</sup>, Chikatoshi Sugimoto<sup>4</sup>, Hideya Kitamura<sup>5</sup>, Noriyuki Enomoto<sup>1</sup>, Ryoko Egashira<sup>6</sup>, Hiromitsu Sumikawa<sup>7</sup>, Tae Iwasawa<sup>8</sup>, Shoichiro Matsushita<sup>9</sup>, Hiroaki Sugiura<sup>10</sup>, Mikiko Hashisako<sup>11</sup>, Tomonori Tanaka<sup>12</sup>, Yasuhiro Terasaki<sup>13</sup>, Shinobu Kunugi<sup>13</sup>, Masashi Kitani<sup>14</sup>, Ryo Okuda<sup>5</sup>, Yasuoki Horiike<sup>1</sup>, Yasunori Enomoto<sup>1</sup>, Hideki Yasui<sup>1</sup>, Hironao Hozumi<sup>1</sup>, Yuzo Suzuki<sup>1</sup>, Yutaro Nakamura<sup>1</sup>, Junya Fukuoka<sup>15</sup>, Takeshi Johkoh<sup>16</sup>, Yasuhiro Kondoh<sup>3</sup>, Takashi Ogura<sup>5</sup>, Yoshikazu Inoue<sup>4</sup>, Yoshinori Hasegawa<sup>17</sup>, Naohiko Inase<sup>18</sup>, Sakae Homma<sup>19</sup>, Takafumi Suda<sup>1</sup>

**Corresponding author (to whom requests for reprints)**

|               |                                                                      |
|---------------|----------------------------------------------------------------------|
| Author Name:  | Tomoyuki Fujisawa                                                    |
| Full Address: | 1-20-1 Handayama Higashi-ku, Hamamatsu 431-3192, Japan               |
| Telephone:    | +81(53)435-2263                                                      |
| Fax:          | +81(53)435-2354                                                      |
| E-mail:       | <a href="mailto:fujisawa@hama-med.ac.jp">fujisawa@hama-med.ac.jp</a> |

## **Online Data Supplement**

### **METHODS**

#### ***Subject***

The development of the nationwide cloud-based database for patients with idiopathic interstitial pneumonias (IIPs) was undertaken by the Diffuse Lung Diseases Research Group from the Ministry of Health, Labor and Welfare, Japan. The Japanese Respiratory Society certifies institutions and training programs. Each institution has multiple board-certified specialists, including those certified as trainers who have passed an accreditation examination. Physicians wanting to specialize in pulmonary medicine must train at a certified institution for at least 3 years. We first administered a survey of 707 certified institutions of the Japanese Respiratory Society to assess the number of patients diagnosed with IIPs in each institution from April 2009 to March 2014. One hundred and fifty-nine institutions replied to the survey. There were 13,598 patients with a diagnosis of IIPs, of whom 1,311 had biopsy-proven IIPs. Of the 159 responding institutions, 39 agreed to the study proposal and participated in the present study. The study subjects were patients diagnosed with IIPs who had undergone chest high-resolution computed tomography (HRCT) and surgical lung biopsy from April 2009 to March 2014 in these institutions. This retrospective study was approved by the Institutional Review Board of the Hamamatsu University School of Medicine (approval number E14-360) and the respective ethics committees of each participating institution. The Institutional Review Board waived patient approval or informed consent because the study involved a retrospective review of patient records.

#### ***Collection of clinical, radiologic, and pathological data***

A case identification number was allocated to each patient for de-identification purposes. The patients' clinical and HRCT data within 3 months before surgical lung biopsy were retrospectively collected. The clinical data, including symptoms, environmental exposures,

smoking history, family history, comorbid illnesses, physical examination findings, blood test results, arterial blood gas analysis (or SpO<sub>2</sub>), pulmonary function tests (FVC, FEV<sub>1</sub>, DLCO), 6-minute walk tests, and treatment were extracted from the medical records as text data files using commercially available software (Filemaker: FileMaker, Inc. Santa Clara, CA, USA). Data from bronchoscopy, including bronchoalveolar lavage, were collected if it had been performed. Results of arterial blood gas analysis, pulmonary function testing, and 6-minute walk tests 1 year after lung biopsy were obtained if the data were available. Treatment after lung biopsy was also recorded. The diagnosis at each institution was reported as the institutional diagnosis. These diagnoses were generally made by attending chest physicians at each institution based on their clinical assessment of the patient and review of radiology and pathology reports. In most cases in which an IIP was diagnosed, these physicians would not have discussed the case with a thoracic radiologist or pulmonary pathologist, as there are very few such specialists in Japan. Therefore, most pulmonologists would not have the opportunity for multidisciplinary discussion (MDD) in person. We did not survey in detail how institutional diagnoses were made, but we assume that MDD was not performed for the majority of the cases. HRCT images were obtained as digital imaging and communications in medicine (DICOM) files. Clinical data files and HRCT DICOM files were preserved on CD-ROM at each institution and collected at Hamamatsu University School of Medicine. Histology specimens from the lung biopsies were collected on glass slides (at least 2 slides for each specimen) and stained with hematoxylin-eosin or elastica van Gieson at Hamamatsu University School of Medicine (one slide with each stain for each specimen). They were then digitized by whole slide image instruments using formats of Philips Digital Pathology Solutions (Philips, Amsterdam, Netherlands). The vital status of the patients was ascertained on October 2017 for survival analysis.

### ***Development of the cloud-based integrated database including clinical, radiologic, and pathological data***

The method for developing the database is shown in Figure 1. The web viewer system and data servers were provided by Esite Healthcare Co., Ltd (Tokyo, Japan). The data center

included three servers, one each for clinical, radiologic, and pathological data. The clinical data files, HRCT DICOM files, and biopsy specimen slide images of were uploaded to each web server separately. The DICOM images were displayed using the XTREK Web View software (J-MAC SYSTEM, Inc. Sapporo, Japan) and the whole slide images with the Image Managing System (Philips, Amsterdam, Netherlands). In order to construct a virtually integrated database, the clinical, radiologic, and pathological data on the separate servers were interlinked by the respective case identification numbers. HTTP and Referer were set to access the clinical data server through the Internet. A log-in ID and password were configured to access the clinical data server. Links to access the DICOM and whole slide image files were placed on the web page of the clinical data for each case.

### ***Conducting web-based MDD using the cloud-based integrated database***

The database allowed user access to all three types of data for the enrolled cases through the Internet regardless of a user's physical location. We devised an MDD model using the cloud-based database. A clinician, radiologist, and pathologist, all experts in interstitial lung disease, each used the database to examine the case records by themselves, after which they discussed the case via video-conferencing (Arcstar Web Conferencing: NTT Communications Co., Ltd, Tokyo, Japan), leading to a multidisciplinary diagnosis (Figure 1). The diagnosis made by MDD was categorized according to the American Thoracic Society (ATS)/European Respiratory Society (ERS)/Japanese Respiratory Society (JRS)/Latin American Thoracic Association (ALAT) IPF statements [1] and ATS/ERS IIPs classification [2]. The categories included idiopathic pulmonary fibrosis, idiopathic nonspecific interstitial pneumonia, cryptogenic organizing pneumonia, desquamative interstitial pneumonia/respiratory bronchiolitis-associated interstitial lung disease, acute interstitial pneumonia, lymphoid interstitial pneumonia, idiopathic pleuroparenchymal fibroelastosis, unclassifiable IIPs, and other diseases (not IIPs). To facilitate recording of the diagnosis, a data input interface was built into the cloud-based database system. The specialists performing web-based MDD for

the study included pulmonologists (K. K., C. S., H. K., and N. E.), radiologists (R. E., H. S., T. I., S. M., and H. S.), and pathologists (M. H., T. T., Y. T., S. K., and M. K.). All have a minimum of 10 years of experience in the diagnosis of interstitial lung diseases including IIPs, and they are each currently working in university hospitals or interstitial lung disease centers. To perform web-based MDDs for the more than 500 cases enrolled in the cloud-based database, we had four MDD teams, each of which consisted of a pulmonologist, a radiologist, and a pathologist. When the MDD was conducted, the three participants were blinded to the institutional diagnosis. Rheumatologists or occupational medicine specialists did not participate in the MDDs. We initially examined inter-team agreement on the first-choice diagnosis for the first 15 cases in the database using Cohen's kappa coefficient ( $\kappa$ ). Agreement for any diagnosis was moderate ( $\kappa = 0.55$ ), while that for a diagnosis of IPF was good ( $\kappa = 0.69$ ). Each team conducted an MDD for about 130 cases.

### ***Survival analysis***

Survival analyses of the enrolled patients were performed for both the institutional and MDD diagnoses. The cumulative survival rates were calculated using the Kaplan-Meier method. The observation period was calculated from the date of the first visit to each institution for an IIP to the last date of contact or time to death. The log-rank test was employed to compare survival between each IIP diagnostic entity. To control for the family-wise error rate, p values in multiple comparisons were adjusted using Holm's method. Cox proportional hazard models were employed to identify variables associated with survival. To compare prognostic discrimination between institutional and MDD diagnoses, we determined Harrell C-indexes for both [3, 4]. Statistical analyses were performed using commercially available software (JMP version 9.0: SAS Institute, Inc., Cary, NC, USA and R version 3.4.3: The R Foundation for Statistical Computing, Vienna, Austria). A p value <0.05 was considered statistically significant.

## References

1. Raghu G, Collard HR, Egan JJ, Martinez FJ, Behr J, Brown KK, Colby TV, Cordier JF, Flaherty KR, Lasky JA, Lynch DA, Ryu JH, Swigris JJ, Wells AU, Ancochea J, Bouros D, Carvalho C, Costabel U, Ebina M, Hansell DM, Johkoh T, Kim DS, King TE, Jr., Kondoh Y, Myers J, Muller NL, Nicholson AG, Richeldi L, Selman M, Dudden RF, Griss BS, Protzko SL, Schunemann HJ, Fibrosis AEJACoIP. An official ATS/ERS/JRS/ALAT statement: idiopathic pulmonary fibrosis: evidence-based guidelines for diagnosis and management. *Am J Respir Crit Care Med* 2011; 183: 788-824.
2. Travis WD, Costabel U, Hansell DM, King TE, Jr., Lynch DA, Nicholson AG, Ryerson CJ, Ryu JH, Selman M, Wells AU, Behr J, Bouros D, Brown KK, Colby TV, Collard HR, Cordeiro CR, Cottin V, Crestani B, Drent M, Dudden RF, Egan J, Flaherty K, Hogaboam C, Inoue Y, Johkoh T, Kim DS, Kitaichi M, Loyd J, Martinez FJ, Myers J, Protzko S, Raghu G, Richeldi L, Sverzellati N, Swigris J, Valeyre D, Pneumonias AEColl. An official American Thoracic Society/European Respiratory Society statement: Update of the international multidisciplinary classification of the idiopathic interstitial pneumonias. *Am J Respir Crit Care Med* 2013; 188: 733-748.
3. Harrell FE, Jr., Califf RM, Pryor DB, Lee KL, Rosati RA. Evaluating the yield of medical tests. *JAMA* 1982; 247: 2543-2546.
4. De Sadeleer LJ, Meert C, Yserbyt J, Slabbynck H, Verschakelen JA, Verbeken EK, Weynand B, De Langhe E, Lenaerts JL, Nemery B, Van Raemdonck D, Verleden GM, Wells AU, Wuyts WA. Diagnostic Ability of a Dynamic Multidisciplinary Discussion in Interstitial Lung Diseases: A Retrospective Observational Study of 938 Cases. *Chest* 2018; 153: 1416-1423.

Table E1. Survival analysis of IIP entities based on MDD diagnosis by multivariate Cox proportional hazard regression analysis

Unclassifiable IIPs and iNSIP

|                               | HR    | 95% CI      | p value |
|-------------------------------|-------|-------------|---------|
| Age (years)                   | 1.03  | 0.997–1.070 | 0.07    |
| %FVC (%)                      | 0.982 | 0.964–0.900 | 0.04    |
| Unclassifiable IIPs vs. iNSIP | 3.73  | 1.33–15.5   | 0.01    |

IPF and Unclassifiable IIPs

|                             | HR    | 95% CI      | p value  |
|-----------------------------|-------|-------------|----------|
| Age (years)                 | 1.05  | 1.03–1.08   | < 0.0001 |
| %FVC (%)                    | 0.976 | 0.966–0.987 | < 0.0001 |
| IPF vs. unclassifiable IIPs | 2.11  | 1.43–3.17   | 0.0001   |

iPPFE and IPF

|               | HR    | 95% CI      | p value  |
|---------------|-------|-------------|----------|
| Age (years)   | 1.08  | 1.04–1.11   | < 0.0001 |
| %FVC (%)      | 0.974 | 0.962–0.986 | < 0.0001 |
| iPPFE vs. IPF | 2.24  | 1.09–4.22   | 0.03     |

IIP: idiopathic interstitial pneumonia; FVC: forced vital capacity; iNSIP: idiopathic non-specific interstitial pneumonia; IPF: idiopathic pulmonary fibrosis; iPPFE: idiopathic pleuroparenchymal fibroelastosis.

## **Figure legends**

### **Figure E1. Web page showing the cloud-based integrated database**

Users could click on (A) the ‘list of enrolled cases,’ (B) ‘display’ to see the data for each case, or (C) ‘DICOM’ and ‘pathological data’ to view the high-resolution computed tomography images and whole slide images, respectively.

### **Figure E2. Clinical data on the portal site**

(A) Diagnosis in each hospital, (B) patient background, (C) findings on surgical biopsy, symptoms and signs, autoimmune features, autoantibodies, bronchoscopy, and diagnosis after surgical lung biopsy.

### **Figure E3. Clinical data on the portal site (laboratory findings)**

### **Figure E4. Clinical data on the portal site (treatment)**

### **Figure E5. Proportion of IIP disease entities of MDD diagnoses in institutional diagnoses**

### **Figure E6. Proportion of IIP disease entities of institutional diagnoses in MDD diagnoses**

### **Figure E7. Major causes of unclassifiable IIPs for the 168 patients with MDD diagnosis of unclassifiable IIPs**

- (1) inadequate clinical, radiologic, or pathologic data
- (2) major discordance between clinical, radiologic, and pathologic findings that may occur in the following situations:
  - (2a) previous therapy resulting in substantial alteration of radiologic or histologic findings.
  - (2b) new entity, or unusual variant of recognized entity, not adequately characterized by the current American Thoracic Society/European Respiratory Society classification.

(2c) multiple high-resolution computed tomography and/or pathologic patterns that may be encountered in patients with idiopathic interstitial pneumonia.

(3) others reasons

**Figure E8. Survival curves for patients in the cohort subdivided by pulmonologist diagnoses, radiologist diagnoses and pathorogist diagnoses**

Figure E1

**A. IIPs clinical radiological pathological database cloud-based browsing system**

- 1) . [list of enrolled cases](#) ← Click here to see the list of cases
- 2) . [registration for multidisciplinary team meeting \(MDTM\)](#)
- 3) . [multidisciplinary team meeting \(MDTM\) for the enrolled cases](#)
- 4) . [logout](#)

  

**B. IIPs clinical radiological pathological database cloud-based browsing system**

list of enrolled cases

| NO | case number | institution | age | sex |                         |
|----|-------------|-------------|-----|-----|-------------------------|
| 1  | 040-001     | A           | 62  | M   | <a href="#">display</a> |
| 2  | 040-002     | A           | 62  | F   | <a href="#">display</a> |
| 3  | 040-003     | A           | 63  | M   | <a href="#">display</a> |
| 4  | 040-004     | A           | 51  | M   | <a href="#">display</a> |
| 5  | 040-005     | A           | 64  | F   | <a href="#">display</a> |
| 6  | 042-001     | B           | 64  | M   | <a href="#">display</a> |
| 7  | 042-002     | B           | 78  | M   | <a href="#">display</a> |
| 8  | 042-003     | B           | 48  | F   | <a href="#">display</a> |
| 9  | 042-004     | B           | 68  | F   | <a href="#">display</a> |
| 10 | 042-005     | B           | 63  | M   | <a href="#">display</a> |

← Click here to see the data of the patient

  

**C. IIPs clinical radiological pathological database cloud-based browsing system**

|             |              |                       |                                   |
|-------------|--------------|-----------------------|-----------------------------------|
| case number | 283-000-test |                       |                                   |
| age         | 63           | <a href="#">DICOM</a> | <a href="#">pathological data</a> |
| sex         | female       |                       |                                   |

display all

diagnosis in each hospital  
patients background  
findings of surgical lung biopsy (SLB)  
laboratory findings  
treatment

Click here to see the virtual slides of lung specimen

Click here to see HRCT images

Click "display all" or the ward to see details of clinical data

Figure E2

A.

## diagnosis in each hospital

|                         |                   |
|-------------------------|-------------------|
| final diagnosis         | NSIP              |
| final diagnosis (other) |                   |
| date of outcome         | 2014/07/03        |
| outcome                 | alive             |
| outcome (other)         | changing hospital |
| cause of death          |                   |
| cause of death (other)  |                   |

B.

## patients background

|                                              |                                          |
|----------------------------------------------|------------------------------------------|
| reason for hospital visit                    | find at the operation for thyroid cancer |
| symptom; cough                               | -                                        |
| symptom; sputum                              | +                                        |
| dyspnea during effort (mMRC)                 | NA                                       |
| form of onset                                | chronic                                  |
| smoking history                              | never                                    |
| smoking history; duration                    |                                          |
| smoking history; number of cigarettes / day  |                                          |
| family history of interstitial lung diseases | -                                        |
| if yes, describe detail                      |                                          |
| inhalation history of dust                   | -                                        |
| if yes, describe detail                      |                                          |
| other                                        |                                          |

C.

## findings of surgical lung biopsy (SLB)

|                        |              |
|------------------------|--------------|
| date                   | 2012/07/10   |
| site of biopsy         | Rt S3, Rt S8 |
| pathological diagnosis | NSIP         |

## clinical symptoms of autoimmune features

|                                                                          |   |
|--------------------------------------------------------------------------|---|
| mechanics hands                                                          | - |
| distal digital tip ulceration                                            | - |
| inflammatory arthritis or polyarticular morning joint stiffness          | - |
| palmar telangiectasia                                                    | - |
| Raynaud's phenomenon                                                     | - |
| unexplained digital edema                                                | - |
| unexplained fixed rash on the digital extensor surfaces (Gottron's sign) | - |
| dry eyes or dry mouth                                                    | - |
| other                                                                    |   |

## autoantibody

|                                         |            |
|-----------------------------------------|------------|
| date                                    | 2012/06/25 |
| rheumatoid factor                       | -          |
| antinuclear antibody (ANA)              | +          |
| ANA; fold                               | 40         |
| ANA; pattern                            | speckled   |
| anti-double stranded DNA                | -          |
| anti-Smith                              | -          |
| anti-SS-A                               | -          |
| anti-SS-B                               | -          |
| anti-Scl-70                             | -          |
| anti-RNP                                | -          |
| anti-centromere                         | -          |
| anti-Jo-1                               | -          |
| anti-aminoacyl-tRNA Synthetase (ARS)    | -          |
| anti-cyclic citrullinated peptide (CCP) | -          |
| anti-PM-Scl                             | NA         |

## bronchoscopy

|                                       |            |
|---------------------------------------|------------|
| performed or not performed            | performed  |
| date                                  | 2012/07/02 |
| bronchoalveolar lavage: recovery rate | 60         |
| total cell count                      | 0.19       |
| AM (%)                                | 91.4       |
| Lym (%)                               | 6          |
| Neut (%)                              | 2.2        |
| Eos (%)                               | 0.4        |
| CD4/CD8                               | 0.66       |

## diagnosis after surgical lung biopsy (MDD)

|          |      |
|----------|------|
| findings | NSIP |
|----------|------|

Figure E3

## laboratory findings

## arterial blood gas analysis

|                             |                            | findings of surgical lung biopsy (SLB) |
|-----------------------------|----------------------------|----------------------------------------|
| arterial blood gas analysis | performed or not performed |                                        |
|                             | date                       | 07 2 2012 12:00AM                      |
|                             | condition                  | room air                               |
|                             | O2 inhalation              |                                        |
|                             | PaCO2 (Torr)               | 45                                     |
|                             | PaO2 (Torr)                | 64                                     |
| SpO2                        | performed or not performed |                                        |
|                             | date                       |                                        |
|                             | SpO2%                      | 97                                     |
|                             | condition                  |                                        |
|                             | O2 inhalation              |                                        |

## serum markers

|                            | findings of surgical lung biopsy (SLB) |
|----------------------------|----------------------------------------|
| performed or not performed |                                        |
| date                       | 2012/07/02                             |
| KL-6 (U/ml)                | 3200                                   |
| SP-D (ng/ml)               | 205                                    |
| LDH (IU/l)                 | 189                                    |

## pulmonary function tests

|                            | findings of surgical lung biopsy (SLB) |
|----------------------------|----------------------------------------|
| performed or not performed | performed                              |
| date                       | 2012/07/02                             |
| FVC (L)                    | 2.7                                    |
| %FVC (%)                   | 102.5                                  |
| FEV1L                      | 2.23                                   |
| %FEV1%                     | 112                                    |

## lung diffusing capacity test

|                            | findings of surgical lung biopsy (SLB) |
|----------------------------|----------------------------------------|
| performed or not performed | performed                              |
| date                       | 2012/07/02                             |
| DLco (ml/min/mmHg)         | 18.35                                  |
| %DLco (%)                  | 111                                    |

## 6 minute walk test

|                            | findings of surgical lung biopsy (SLB) |
|----------------------------|----------------------------------------|
| performed or not performed | performed                              |
| date                       | 2012/07/02                             |
| walk distance (m)          | 532                                    |
| minimum SpO2 (%)           | 93                                     |

Figure E4

**treatment****treatment before surgical lung biopsy (data not performed)**

|                                           |               |
|-------------------------------------------|---------------|
| performed or not performed                | not performed |
| date                                      |               |
| treatment                                 |               |
| corticosteroid + immunosuppressant        |               |
| corticosteroid + immunosuppressant; other |               |
| anti-fibrotic agents                      |               |

**treatment after surgical lung biopsy (data performed)**

|                                           |                |
|-------------------------------------------|----------------|
| performed or not performed                | performed      |
| date                                      | 2012/08/10     |
| treatment                                 | corticosteroid |
| corticosteroid + immunosuppressant        |                |
| corticosteroid + immunosuppressant; other |                |
| anti-fibrotic agents                      |                |

**2nd line treatment (data not performed)**

|                                           |               |
|-------------------------------------------|---------------|
| performed or not performed                | not performed |
| date                                      |               |
| treatment                                 |               |
| corticosteroid + immunosuppressant        |               |
| corticosteroid + immunosuppressant; other |               |
| anti-fibrotic agents                      |               |

Figure E5

Institutional diagnosis

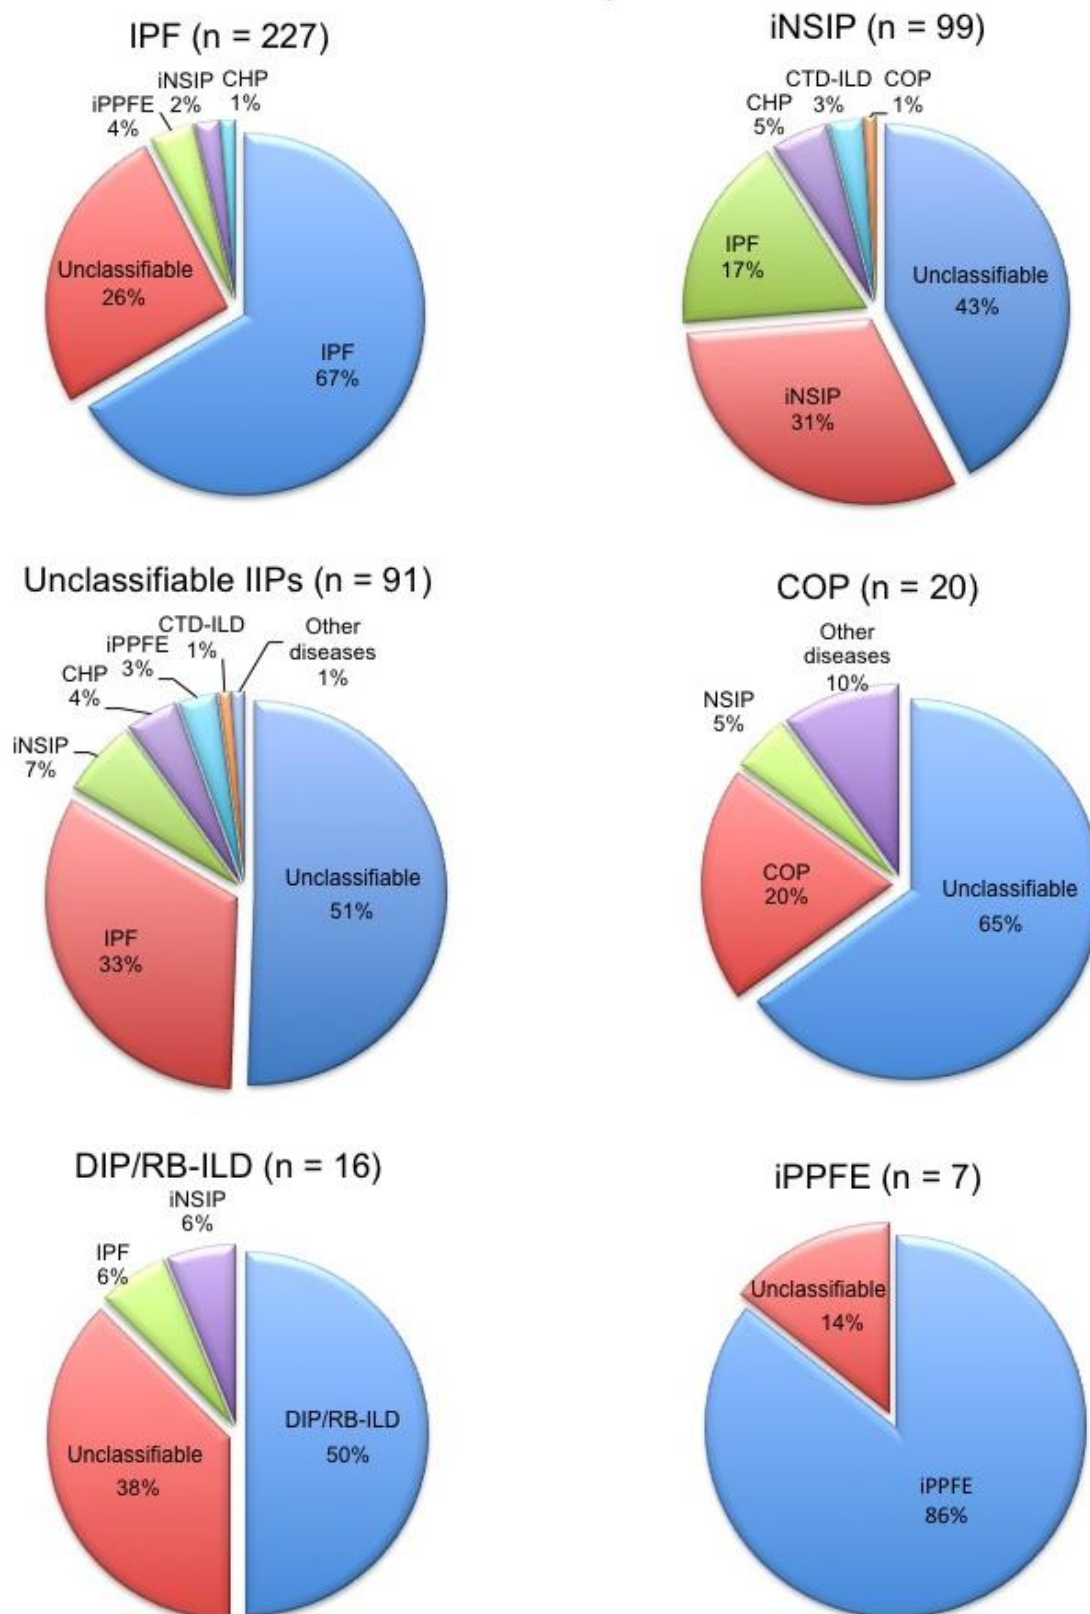

Figure E6

MDD diagnosis

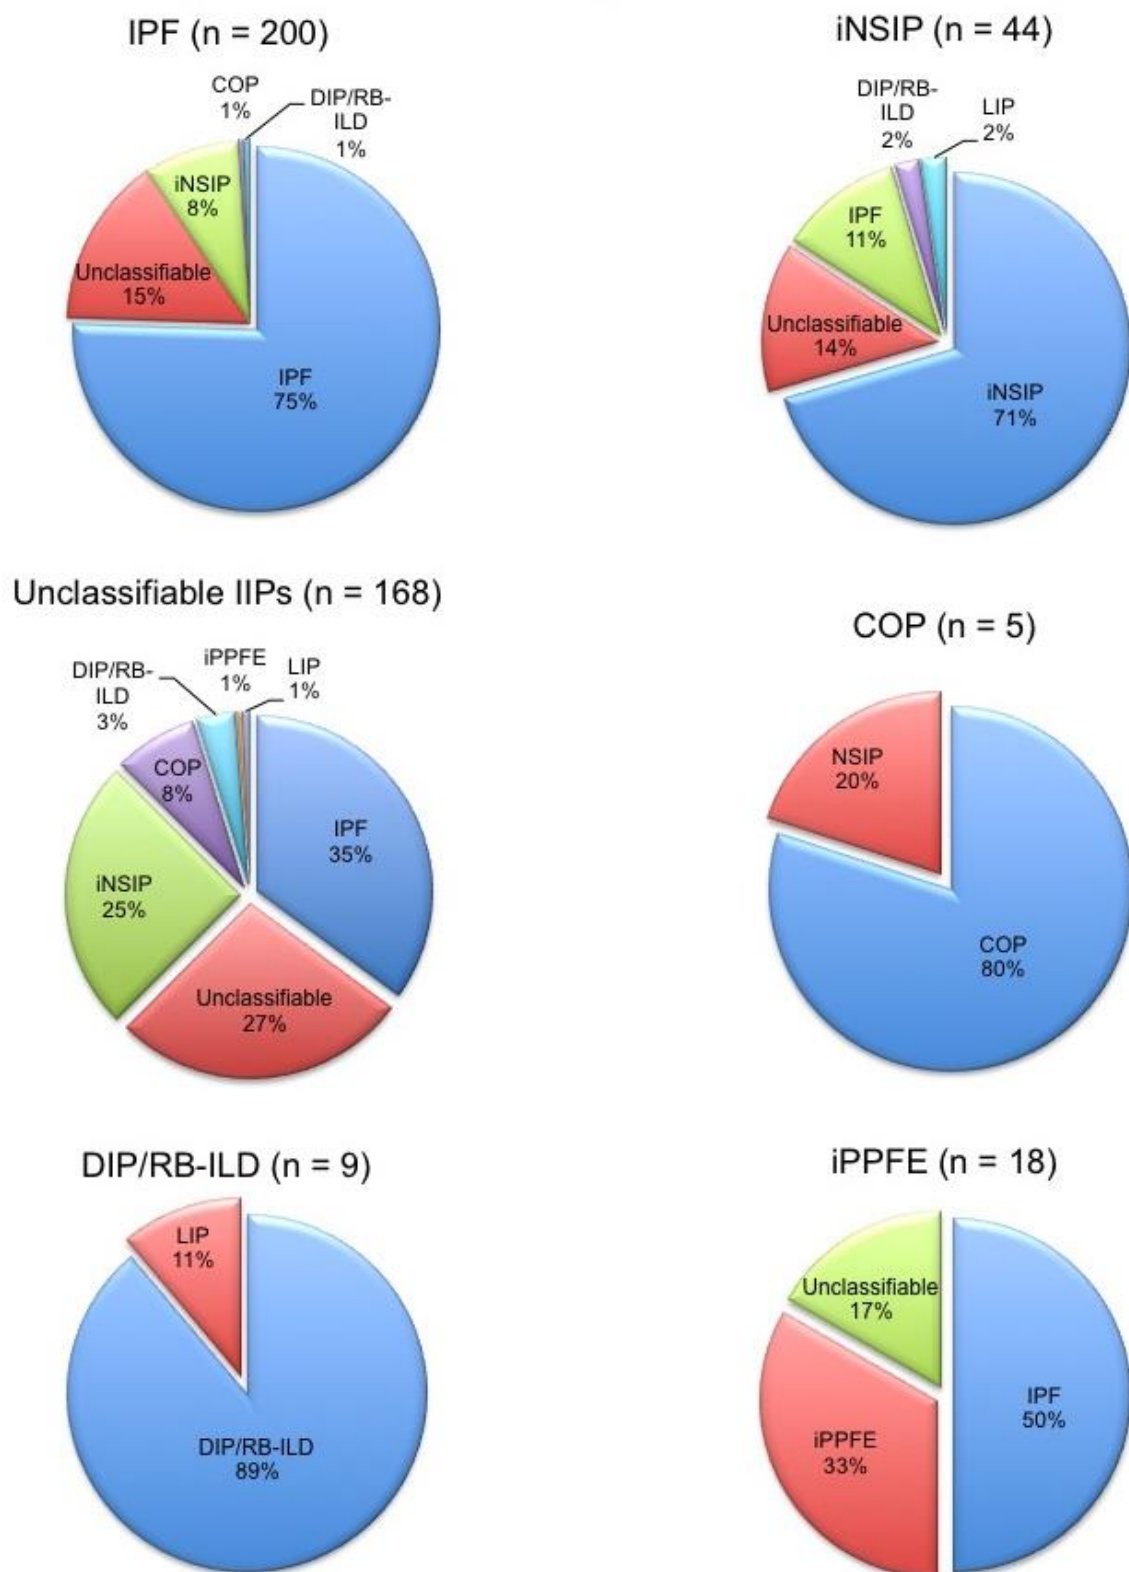

Figure E7

168 patients with MDD diagnosis of unclassifiable IIPs

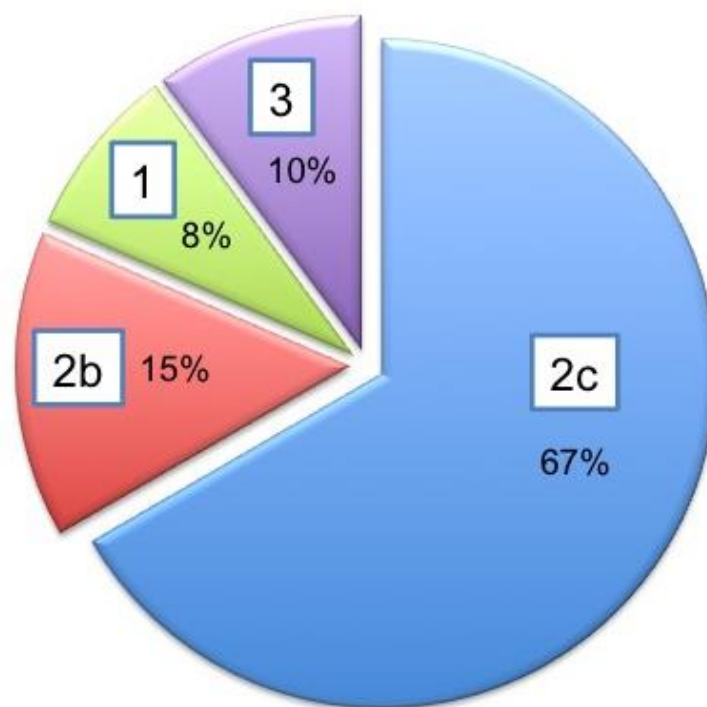

Figure E8

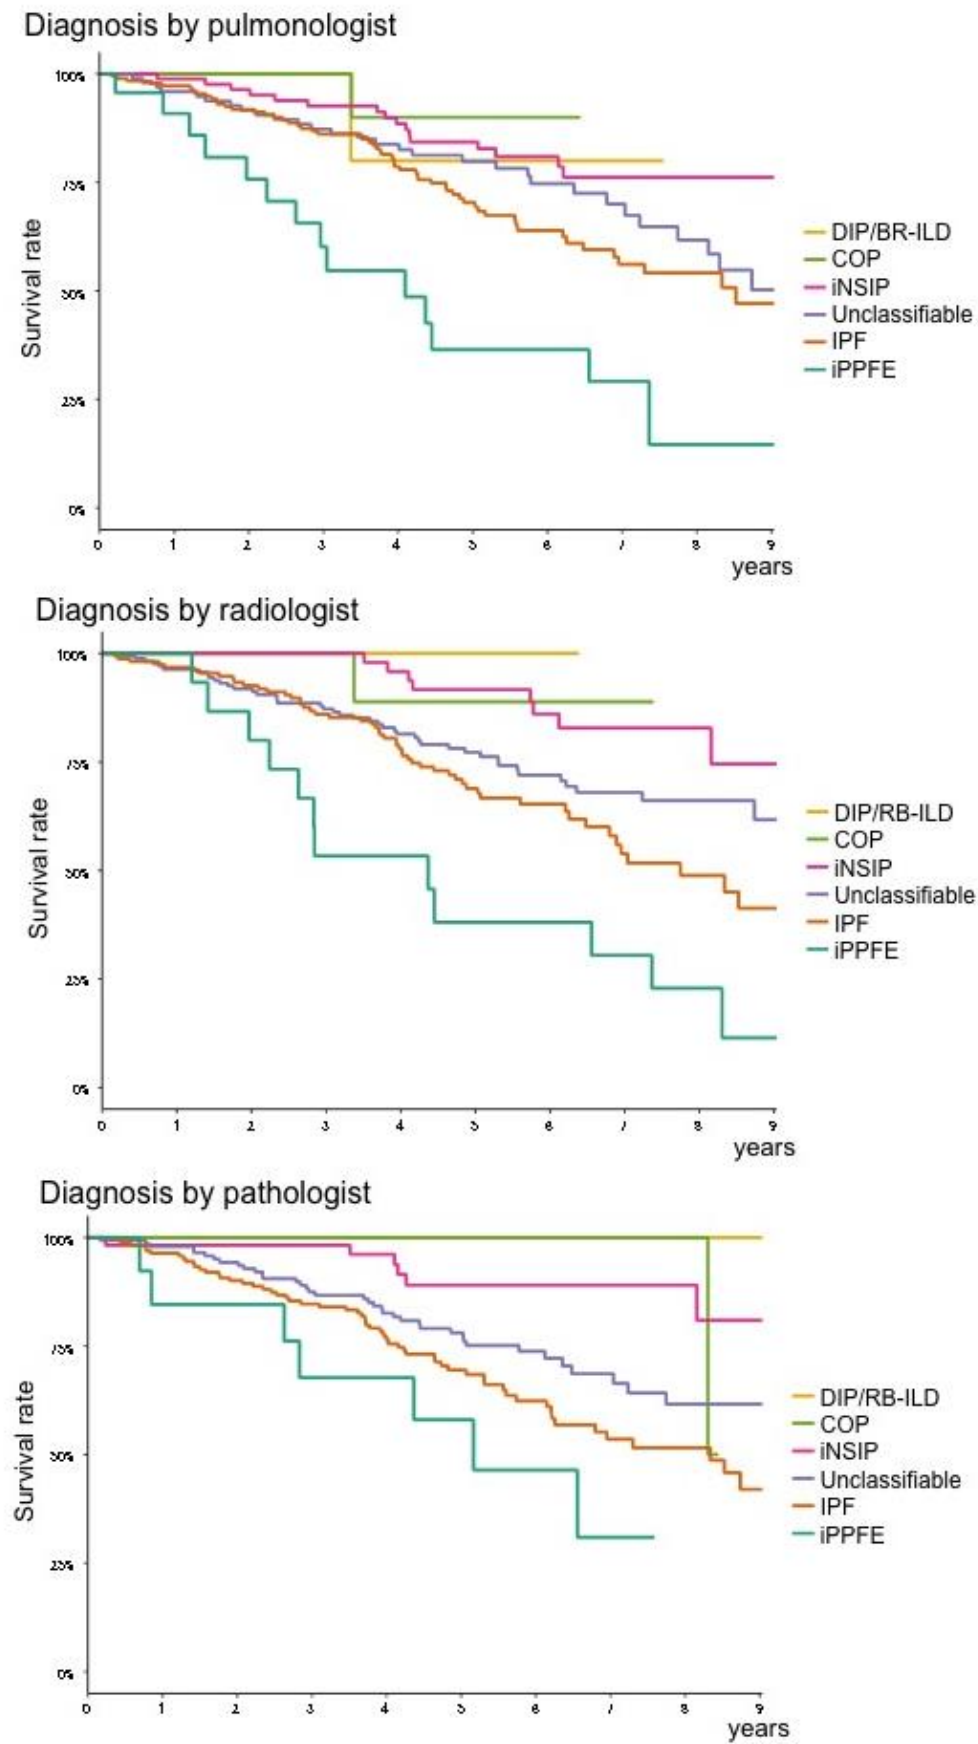

Supplement: inline-supplementary-material-1 [file inline-supplementary-material-1.pdf]
